# Supplementary material for: Dusp6 deficiency attenuates neutrophil-mediated cardiac damage in the acute inflammatory phase of myocardial infarction
Source: PubMed Central journal article supplement (PMC9637103; doi:10.1038/s41467-022-33631-z), 2022-11-05
Supplement: 41467_2022_33631_MOESM1_ESM.pdf [file 41467_2022_33631_MOESM1_ESM.pdf]

## Supplementary Information

### ***Dusp6* deficiency attenuates neutrophil-mediated cardiac damage in the acute inflammatory phase of myocardial infarction**

Xiaohai Zhou<sup>1</sup>, Chenyang Zhang<sup>1,2</sup>, Xueying Wu<sup>1</sup>, Xinli Hu<sup>1</sup>, Yan Zhang<sup>1</sup>, Xuelian Wang<sup>1</sup>, Lixia Zheng<sup>1</sup>, Peng Gao<sup>1</sup>, Jianyong Du<sup>1</sup>, Wen Zheng<sup>1</sup>, Haibao Shang<sup>1</sup>, Keping Hu<sup>3</sup>, Zhengfan Jiang<sup>4</sup>, Yu Nie<sup>5</sup>, Shengshou Hu<sup>5</sup>, Rui-Ping Xiao<sup>1,2</sup>, Xiaojun Zhu<sup>1,2\*</sup> & Jing-Wei Xiong<sup>1,2\*</sup>

#### **Contents:**

- 1) Supplementary Figures 1-21 and Figure Legends;
- 2) Uncropped blots in Supplementary Figures (Supplementary Figures 22-28);
- 3) Supplementary Tables 1-3

## Supplementary Figures and Figure Legends

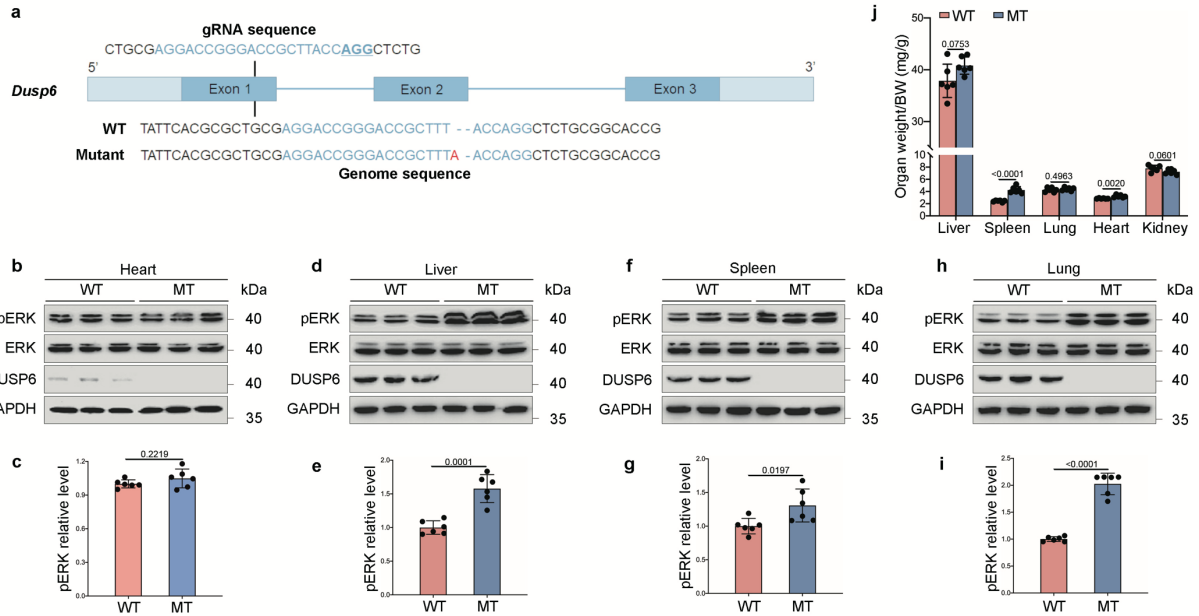

**Supplementary Figure 1. *Dusp6* deficiency enhances ERK phosphorylation in the rat liver, spleen and lung but not the heart. (a)** Schematic of the *Dusp6* mutant allele generated by CRISPR/gRNA in rats, showing the insertion of an adenine nucleotide in exon 1 of the *Dusp6* gene. **(b-i)** Western blots and corresponding quantitative analysis showing DUSP6 expression and ERK phosphorylation (pERK) levels in WT and *Dusp6* mutant rat heart **(b and c)**, liver **(d and e)**, spleen **(f and g)**, and lung **(h and i)**. GAPDH and ERK served as internal references. n = 6/group. All blots within each individual panel were performed in parallel with the same samples. **(j)** Quantitative measurements on the ratio of organ weight/body weight in WT and *Dusp6* mutant rats. n = 6/group. All quantitative data shown in this figure are presented as mean values  $\pm$  SD. Two-sided unpaired T-test was used to calculate the presented p-values. Source data of **c**, **e**, **g**, **i** and **j** are provided in a Source Data File. WT: wild type; MT: *Dusp6* mutant.

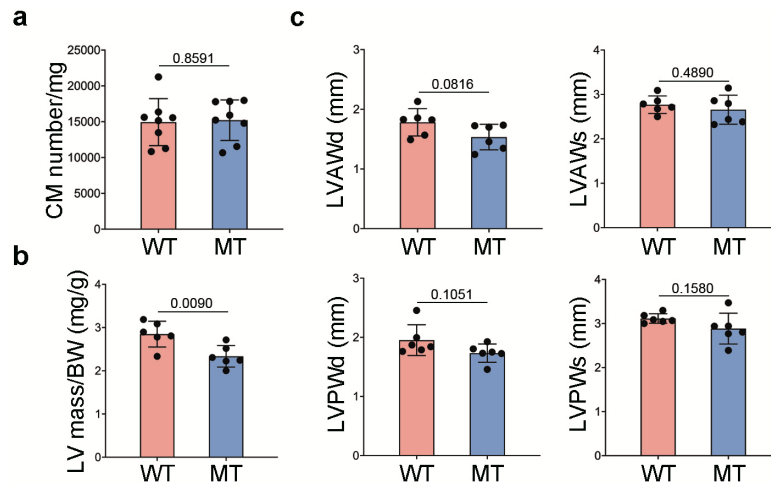

**Supplementary Figure 2. *Dusp6* deficiency has no effect on the CM number,**

**tissue mass and wall thickness of the LV. (a)** Quantification of the numbers of CMs

in 1 mg LV tissues from WT and *Dusp6*-deficient rats at 2 months old. n=8/group. **(b-c)**

LV mass **(b)** and anterior/posterior wall thickness at diastole and systole **(c)** in WT and

*Dusp6*-deficient rats at 2 months old evaluated by echocardiography. n=6/group. All

quantitative data shown in this figure are presented as mean values  $\pm$  SD. Two-sided

unpaired T-test was used to calculate the presented p-values. Source data of **a**, **b** and **c**

are provided in a Source Data File. WT: wild type; MT: *Dusp6* mutant; CM:

cardiomyocytes; LV: left ventricle; BW: body weight; LVAWd: LV anterior wall thickness

at diastole; LVAWs: LV anterior wall thickness at systole; LVPWd: LV posterior wall

thickness at diastole; LVPWs: LV posterior wall thickness at systole.

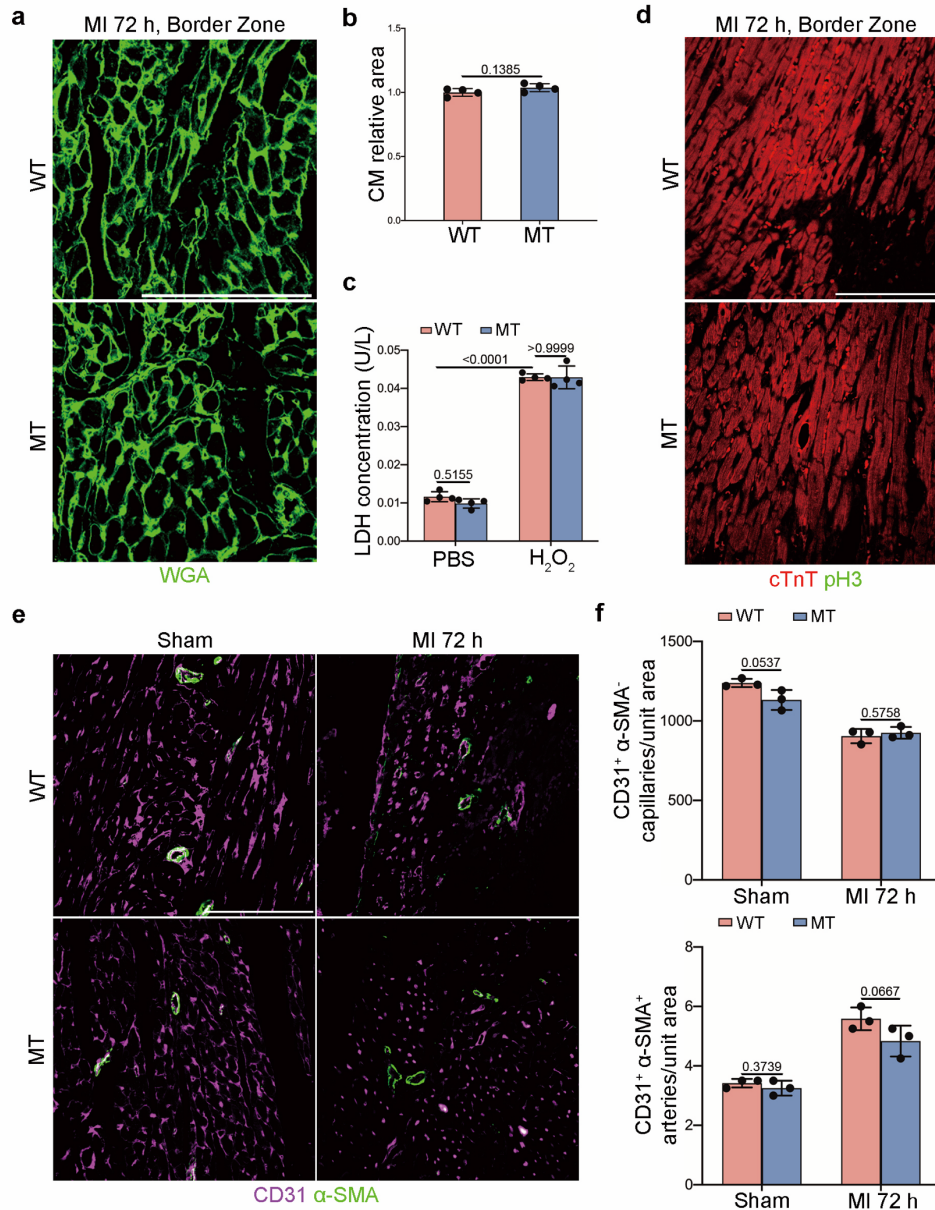

**Supplementary Figure 3. *Dusp6* deficiency has no effect on CM hypertrophy, apoptosis and proliferation as well as angiogenesis after MI. (a-b) WGA staining and corresponding quantitative analysis of CM area in WT and *Dusp6*-deficient LV tissue at 72 h after MI (n = 4 biological independent samples/group; scale bar, 100 μm). (c) Quantitative analysis of LDH release of WT and *Dusp6* mutant NRVMs in the presence and absence of H<sub>2</sub>O<sub>2</sub>. n = 4/group. (d) Immunostaining of pH3 in WT and *Dusp6*-deficient LV tissue at 72 h after MI. cTnT staining was used to label**



cardiomyocytes (n = 3 biological independent samples/group; scale bar, 100  $\mu$ m). **(e-f)** Double immunofluorescence staining for CD31 and  $\alpha$ -SMA and the numbers of CD31<sup>+</sup> $\alpha$ -SMA<sup>-</sup> capillaries and CD31<sup>+</sup> $\alpha$ -SMA<sup>+</sup> arteries in WT and *Dusp6*-deficient LV tissue in sham-operated rats and 72 h after MI (n = 3 biological independent samples/group; scale bar, 100  $\mu$ m). All quantitative data shown in this figure are presented as mean values  $\pm$  SD. One-way ANOVA with Tukey's multiple comparison test (for **c**) and Two-sided unpaired T-test (for **b** and **f**) were used to calculate the presented p-values. Source data of **b**, **c** and **f** are provided in a Source Data File. WT: wild type; MT: *Dusp6* mutant; CM, cardiomyocyte; WGA, wheat germ agglutinin; LDH, lactate dehydrogenase; NRVMs, neonatal rat ventricular myocytes;  $\alpha$ -SMA,  $\alpha$ -smooth muscle actin; pH3, phosphorylated histone H3; cTnT, cardiac troponin T.

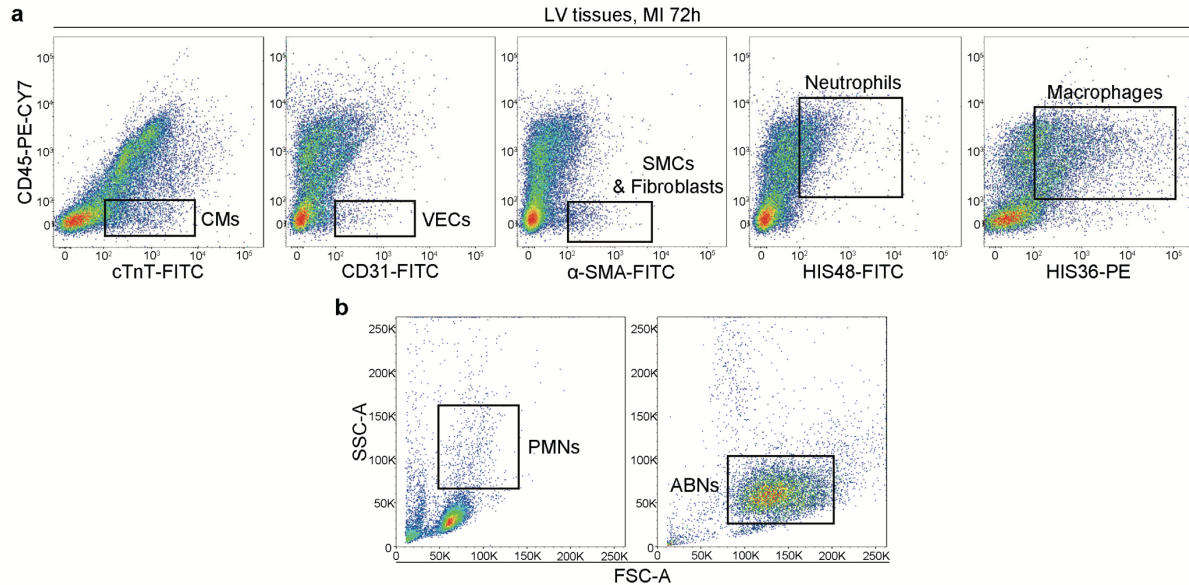

**Supplementary Figure 4. Gating strategy for different cell populations from LV tissue and PBLs. (a)** Representative gating images of flow cytometry analysis for single-cell populations from WT LV tissue at 72 h after MI using the pan-leukocyte cell surface marker CD45, cTnT for cardiomyocytes (CMs), CD31 for vascular endothelial cells (VECs),  $\alpha$ -SMA for smooth muscle cells (SMCs) and fibroblasts, HIS48 for neutrophils, and HIS36 for macrophages. **(b)** Representative grouping of PMNs and ABNs by FSC/SSC in flow cytometry. PBLs, peripheral blood leukocytes; PMNs, polymorphonuclear cells (peripheral neutrophils); ABNs, abdominal neutrophils; FSC-A, forward scatter channel-area; SSC-A, side scatter channel-area.

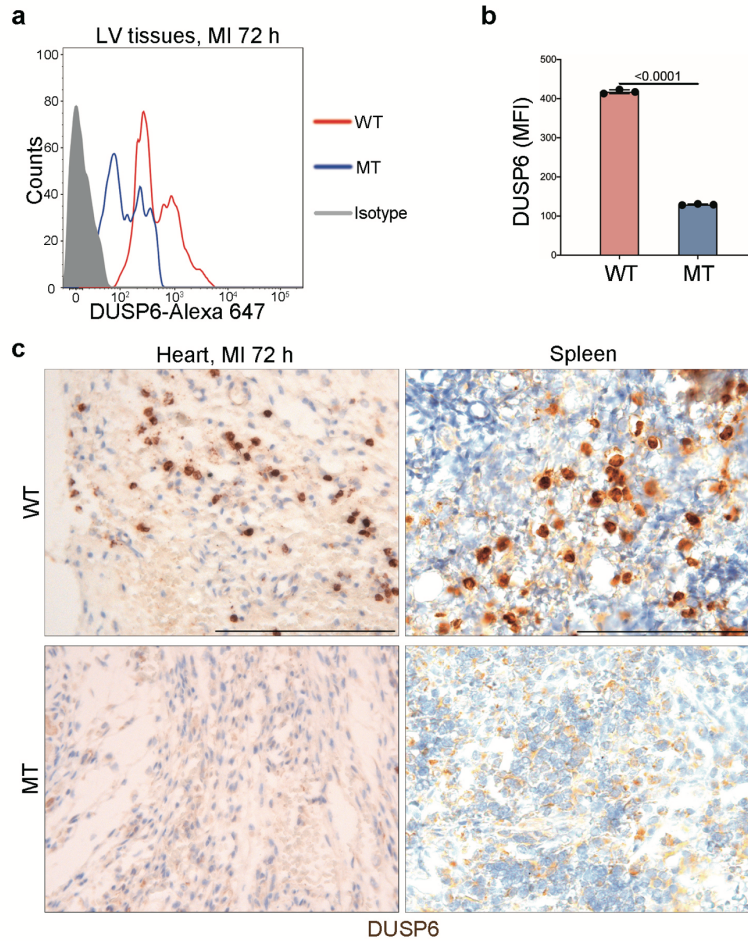

**Supplementary Figure 5. Specificity of DUSP6 antibodies for flow cytometry and immunostaining assays. (a-b)** Intracellular staining, flow cytometry and corresponding quantitative analysis of DUSP6 in single-cell suspensions from WT and *Dusp6*-deficient LV tissues at 72 h after MI using DUSP6 antibody 1 (Abcam, ab76310). n = 3 biological independent samples/group. **(c)** Representative immunohistochemistry images and high-magnification views of Dusp6 protein expression in WT and *Dusp6*-deficient spleens and LV tissues at 72 h after MI using DUSP6 antibody 2 (Origene, TA323084). n = 3 biological independent samples/group; scale bar: 100  $\mu$ m. All quantitative data shown in this figure are presented as mean values  $\pm$  SD. Two-sided unpaired T-test

was used to calculate the presented p-values. Source data of **b** are provided in a Source Data File. WT: wild type; MT: *Dusp6* mutant.

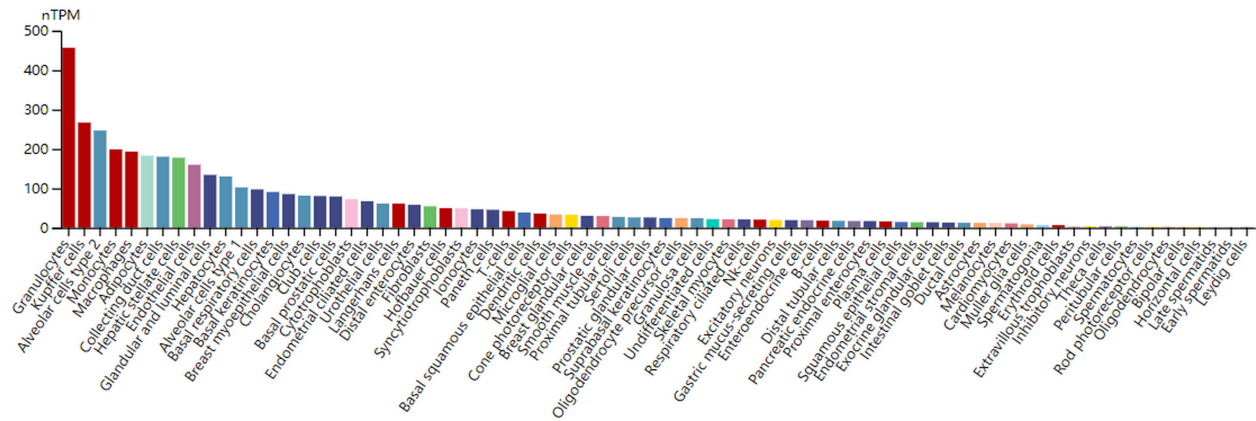

**Supplementary Figure 6. Expression levels of *DUSP6* RNA in multiple human cell**

**types (The Human Protein Atlas data). Granulocytes present the strongest *DUSP6***

level among these cells, whereas the main cell subsets making up cardiac tissues,

including cardiomyocytes, fibroblasts, endothelial cells and smooth muscle cells display

moderate or weak *DUSP6* expression.

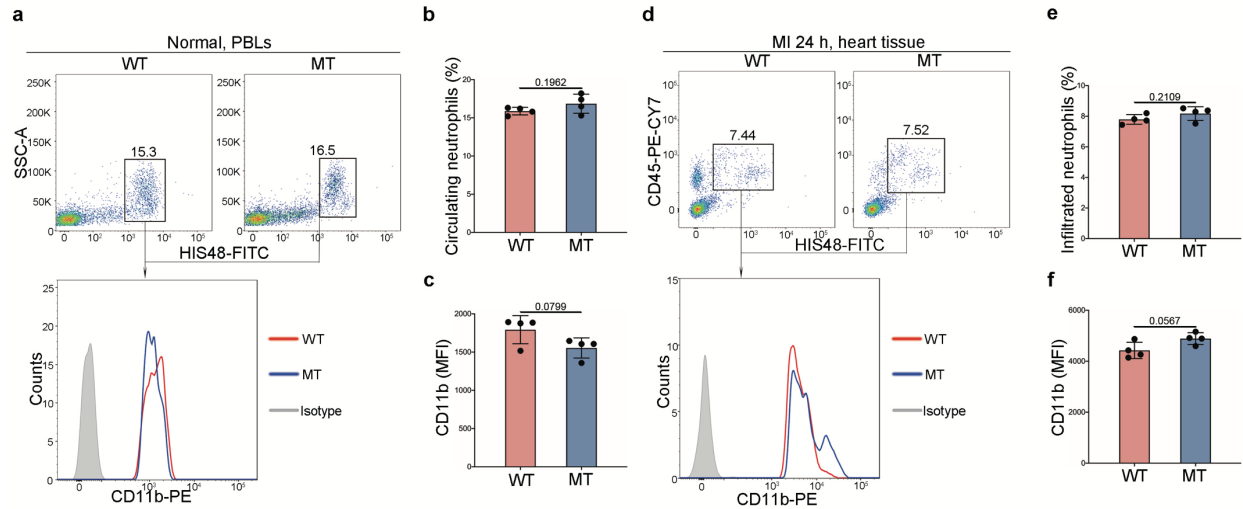

**Supplementary Figure 7. *Dusp6* deficiency has no effect on neutrophil development, differentiation, and chemotaxis. (a-c)** Flow cytometry with HIS48 and CD11b antibody and corresponding quantitative analysis of HIS48<sup>+</sup> neutrophils in WT and *Dusp6*-deficient PBLs, as well as the CD11b expression level in WT and *Dusp6*-deficient HIS48<sup>+</sup> neutrophils. **(d-f)** Flow cytometry and corresponding quantitative analysis of infiltrated CD45<sup>+</sup>HIS48<sup>+</sup> neutrophils from WT and *Dusp6*-deficient LV tissue at 24 h after MI, as well as the CD11b expression level in WT and *Dusp6*-deficient infiltrated CD45<sup>+</sup>HIS48<sup>+</sup> neutrophils. n = 4 biological independent samples/group. All quantitative data shown in this figure are presented as mean values ± SD. Two-sided unpaired T-test was used to calculate the presented p-values. Source data of **b**, **c**, **e** and **f** are provided in a Source Data File. WT: wild type; MT: *Dusp6* mutant.

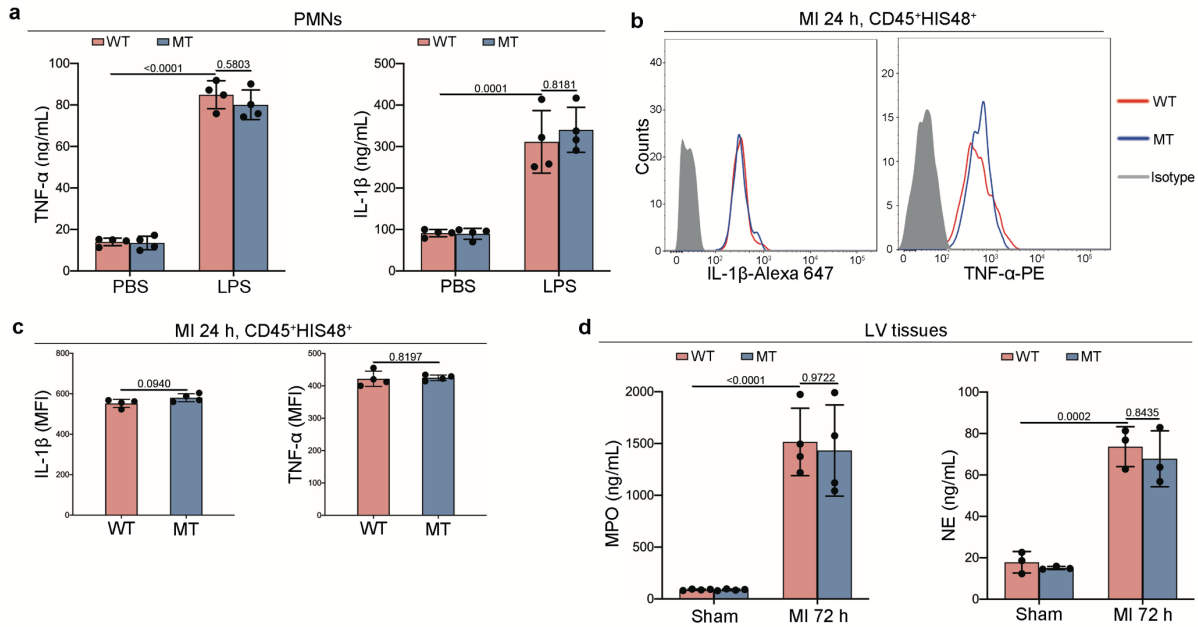

**Supplementary Figure 8. Release of inflammatory cytokines, azurophilic granules, and NETs are not affected in *Dusp6*-deficient neutrophils. (a)** ELISA analysis of TNF- $\alpha$  and IL-1 $\beta$  release in WT and *Dusp6*-deficient PMNs with either PBS or LPS stimulation (n = 4/group). **(b-c)** Flow cytometric sorting and corresponding quantitative analysis of IL-1 $\beta$  and TNF- $\alpha$  in CD45<sup>+</sup>HIS48<sup>+</sup> neutrophils from WT and *Dusp6*-deficient LV tissue at 24 h after MI (n = 4/group). **(d)** ELISA analysis of MPO (n = 4/group) and NE (n = 3/group) in WT and *Dusp6*-deficient LV tissue from sham-operated rats and 72 h after MI. All quantitative data shown in this figure are presented as mean values  $\pm$  SD. One-way ANOVA with Tukey's multiple comparison test (for **a** and **d**) and Two-sided unpaired T-test (for **c**) were used to calculate the presented p-values. Source data of **a**, **c** and **d** are provided in a Source Data File. WT: wild type; MT: *Dusp6* mutant; LPS, lipopolysaccharide; IL-1 $\beta$ , interleukin-1 $\beta$ ; TNF- $\alpha$ , tumor necrosis factor- $\alpha$ ; MPO, myeloperoxidase; NE, neutrophil elastase.

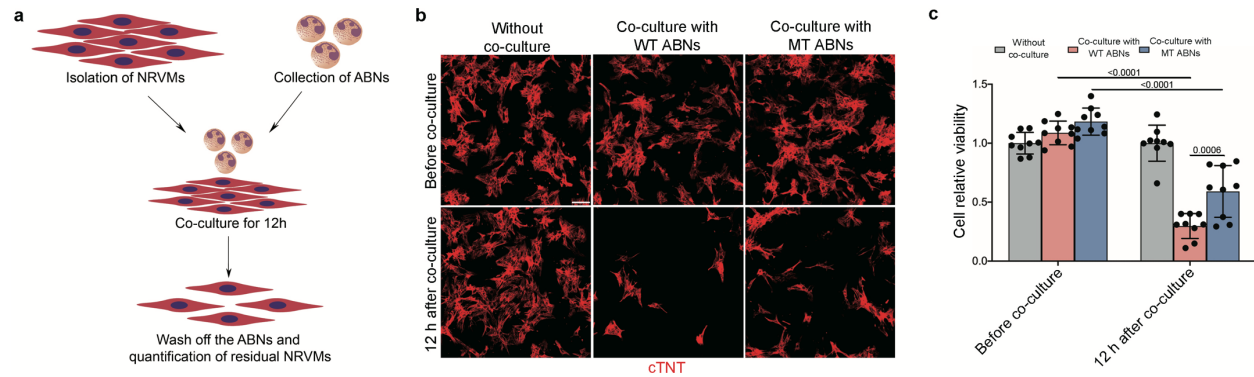

**Supplementary Figure 9. *Dusp6* deficiency in neutrophils attenuates cardiac damage in vitro.** (a) Schematic of in vitro assay of neutrophil killing-activity against cardiomyocytes. NRVMs from WT neonatal rats alone, NRVMs and ABNs from WT or *Dusp6*-deficient rats were co-cultured for 12 h. The numbers of viable NRVMs were determined by cTnT immunostaining and cell viability assays. (b) Immunostaining of cTnT in NRVMs alone, with WT ABNs or *Dusp6* mutant ABNs before co-culture and 12 h after co-culture (scale bar, 50  $\mu$ m). (c) Cell viability assays for NRVMs before and after co-culture as in b (n = 9/group). All quantitative data shown in this figure are presented as mean values  $\pm$  SD. One-way ANOVA with Tukey's multiple comparison test was used to calculate the presented p-values. Source data of c are provided in a Source Data File. WT: wild type; MT: *Dusp6* mutant; NRVMs, neonatal rat ventricular myocytes; cTnT: cardiac Troponin T.



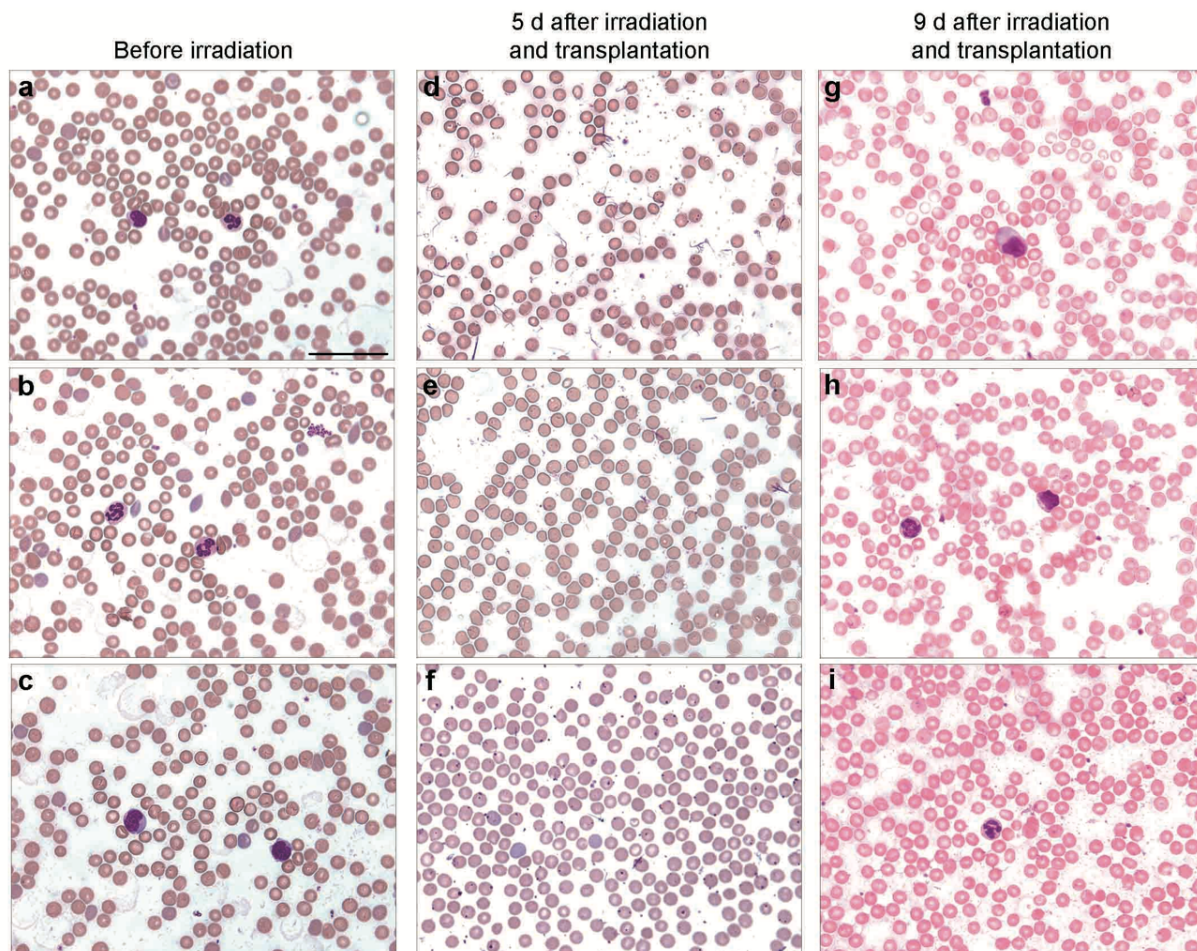

**Supplementary Figure 10. Dynamic changes of peripheral blood leukocytes (PBLs) before and after bone marrow cell transplantation.** Giemsa staining of rat whole blood collected from the tail vein before irradiation (**a-c**), and 5 days (**d-f**) and 9 days (**g-i**) after transplantation, showing complete depletion of leukocytes at 5 days after irradiation and recovery of new leukocytes at 9 days after irradiation and bone marrow transplantation. The nuclei of PBLs stained purple, distinguishing them from red-stained erythrocytes. n = 6 rats/group. Scale bar: 100  $\mu$ m.

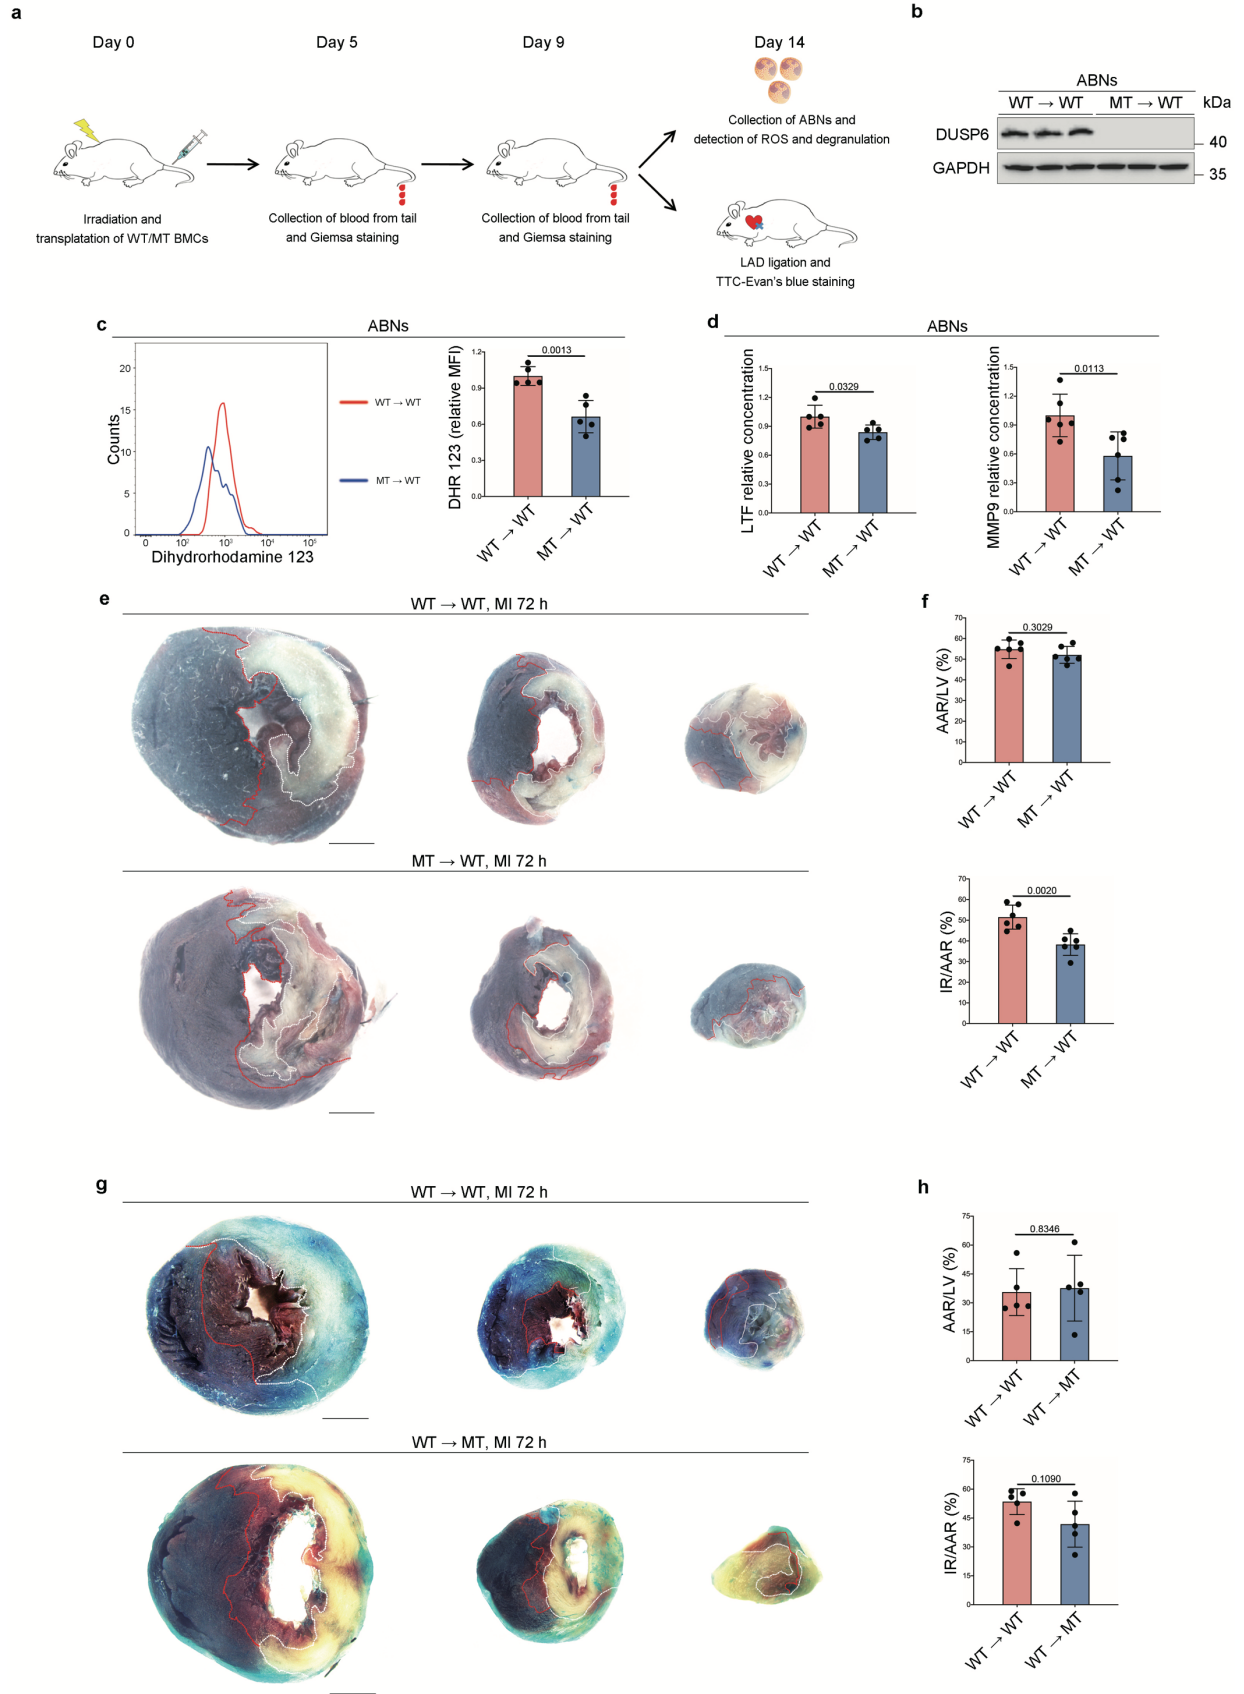

**Supplementary Figure 11. Reduction of neutrophil-mediated cardiac damage after MI by transplantation of *Dusp6*-deficient bone marrow cells.** (a) Schematic of rat bone marrow cell (BMC) transplantation and subsequent assay for neutrophil function and post-MI cardiac damage at different time points. (b) Western blot of DUSP6 in ABNs from irradiated WT rats receiving WT (WT → WT) or *Dusp6*-deficient (MT → WT) BMC transplantation. GAPDH served as internal control (n = 3 biological independent samples/group). Both blots were performed in parallel with the same samples. (c-d) DHR 123 staining assays of ROS production (c) and ELISA analysis of LTF and MMP9 release (d) in ABNs from WT → WT and MT → WT rats (n = 5 biological independent samples/group). (e-h) TTC-Evans blue staining and corresponding quantitative analysis of the infarct area in hearts from MT → WT (e-f) and WT → MT (g-h) rats at 72 h after MI. WT → WT rats were used as controls. n = 6 rats/group for e-f; n = 5 rats/group for g-h; scale bar, 5 mm. All quantitative data shown in this figure are presented as mean values ± SD. Two-sided unpaired T-test was used to calculate the presented p-values. Source data of c, d, f and h are provided in a Source Data File. WT: wild type; MT: *Dusp6* mutant.

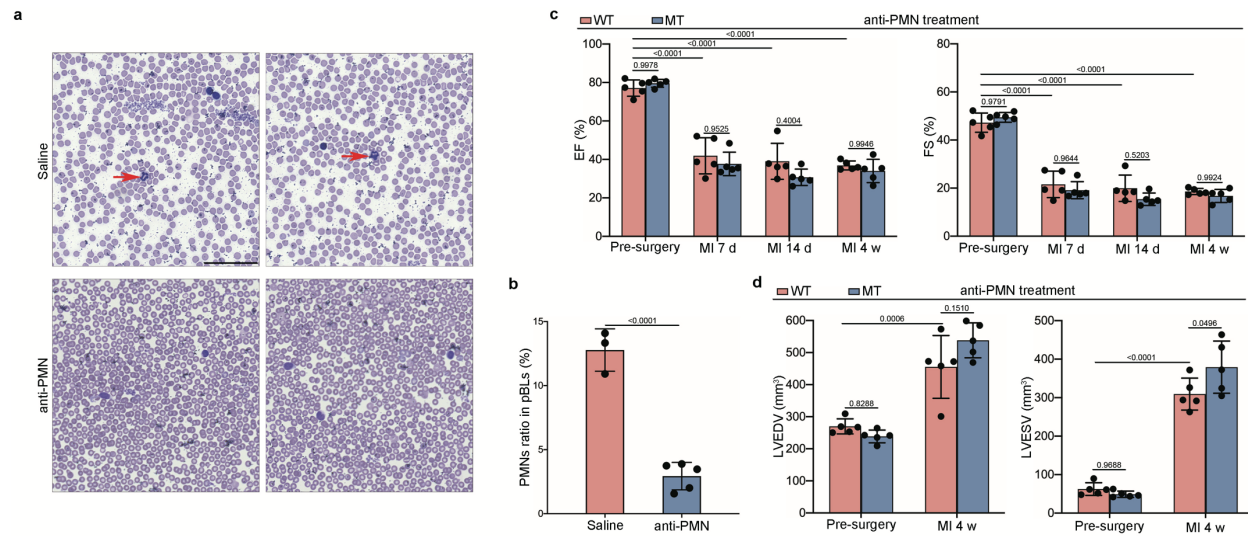

**Supplementary Figure 12. Depletion of peripheral neutrophils ablates the improvement of cardiac function in *Dusp6*-deficient rats post-MI. (a-b) Giemsa staining (a) and corresponding quantitative analysis (b) of PMNs in whole blood collected from rats injected with anti-PMN antibody (250  $\mu$ L/kg) or saline (as control) for three consecutive days. n = 3 animals for saline group and 5 animals for anti-PMN group. PMNs were indicated by the red arrows. Scale bar: 100  $\mu$ m. (c) Echocardiographic measurements of EF and FS for neutrophil-depleted WT and *Dusp6*-deficient rats before surgery, as well as 7 days, 14 days and 4 weeks after MI. (d) Echocardiographic measurements of LVEDV and LVESV for neutrophil-depleted WT and *Dusp6*-deficient rats before surgery and 4 weeks after MI. n = 5 rats/group. One-way ANOVA with Tukey's multiple comparison test (for c and d) and Two-sided unpaired T-test (for b) were used to calculate the presented p-values. Source data of b, c and d are provided in a Source Data File. WT: wild type; MT: *Dusp6* mutant; PMNs: polymorphonuclear cells (peripheral neutrophils).**

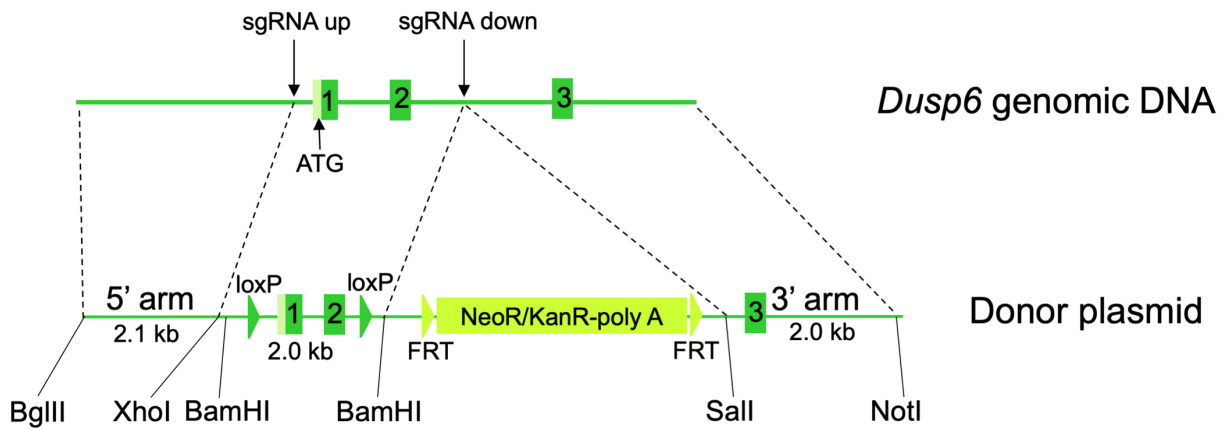

**Supplementary Figure 13. Generation of *Dusp6*-floxed mice.** Two single-guide RNAs (sgRNA) were designed to facilitate Cas9 nuclease to target the upstream of exon 1 and the downstream of exon 2, respectively. The targeting donor vector containing the sequences of exon 1 and 2 flanked by two loxP sites, as well as 5' and 3' homologous arms is shown at the bottom. The NeoR/KanR-poly A sequence was removed by using the Flp delete mice.



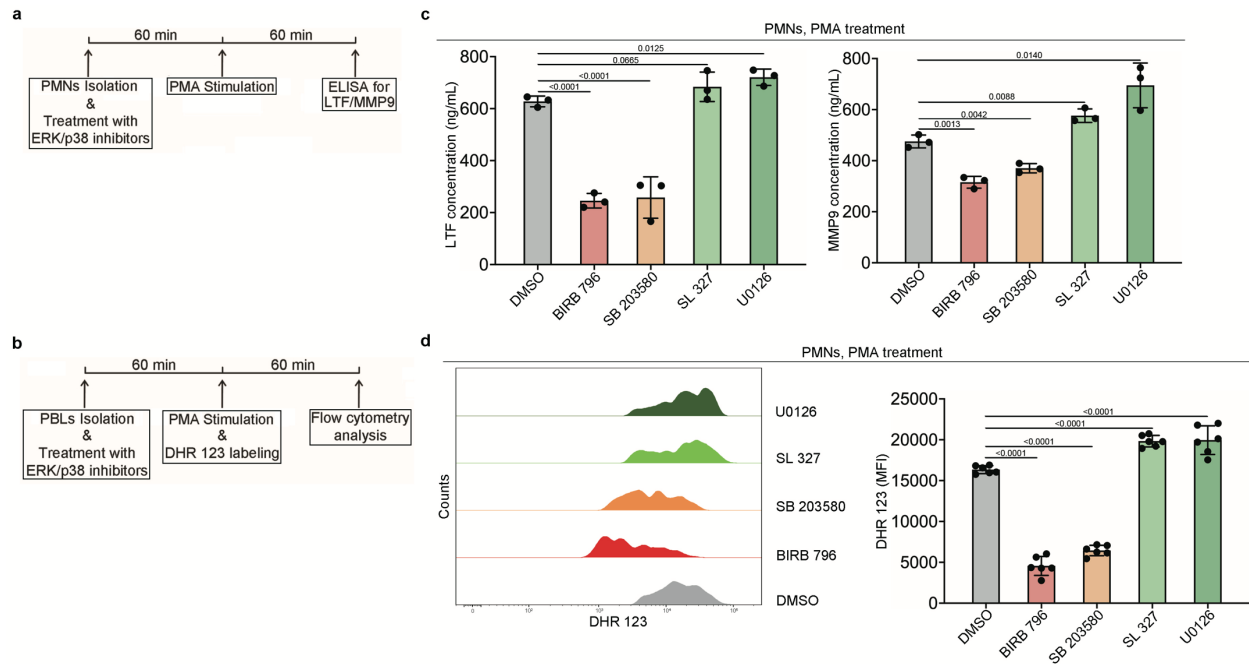

**Supplementary Figure 14. Pre-inhibition of p-p38 but not pERK decreases ROS**

**release and degranulation of neutrophils. (a-b) Protocols for the pre-treatment of**

resting peripheral neutrophils (PMNs) with ERK/p38 inhibitors and subsequent

measurement of degranulation and ROS release after PMA stimulation. **(c) ELISA**

analysis of LTF and MMP9 release in WT PMNs pre-treated with ERK/p38 inhibitors or

DMSO (control). n = 3 biological independent samples/group. **(d) DHR 123 staining,**

flow cytometry and corresponding quantitative analysis of ROS levels in WT PMNs pre-

treated with ERK/p38 inhibitors or DMSO (control). n = 6 biological independent

samples/group. All quantitative data shown in this figure are presented as mean values

± SD. One-way ANOVA with Tukey's multiple comparison test and Two-sided unpaired

T-test were used to calculate the presented p-values. Source data of **c** and **d** are

provided in a Source Data File. PMA, phorbol-12-myristate-13-acetate; LTF, lactoferrin;

MMP9: matrix metalloproteinase 9; DHR 123: dihydrorhodamine 123.

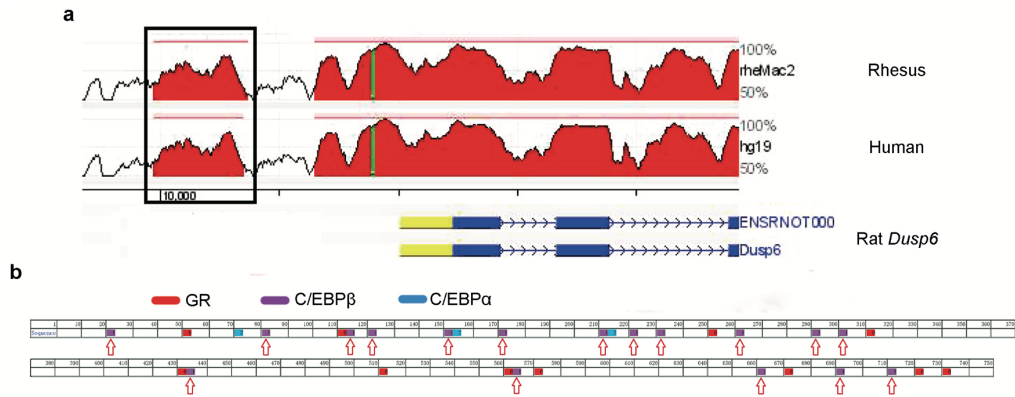

**Supplementary Figure 15. In silico analysis of rat *Dusp6* gene promoter. (a)** A conserved sequence (black box) in the *Dusp6* promoter region (from –2030 to –1284 bp) retrieved by sequence alignment ([www.dcode.org](http://www.dcode.org)). The heights of red peaks represent the degree of sequence homology in the genomic regions of human and rhesus compared with rats. **(b)** Computational prediction of C/EBPβ (purple with red arrows), C/EBPα (blue), and GR (red) binding sites in the conserved *Dusp6* promoter fragment using PROMO.

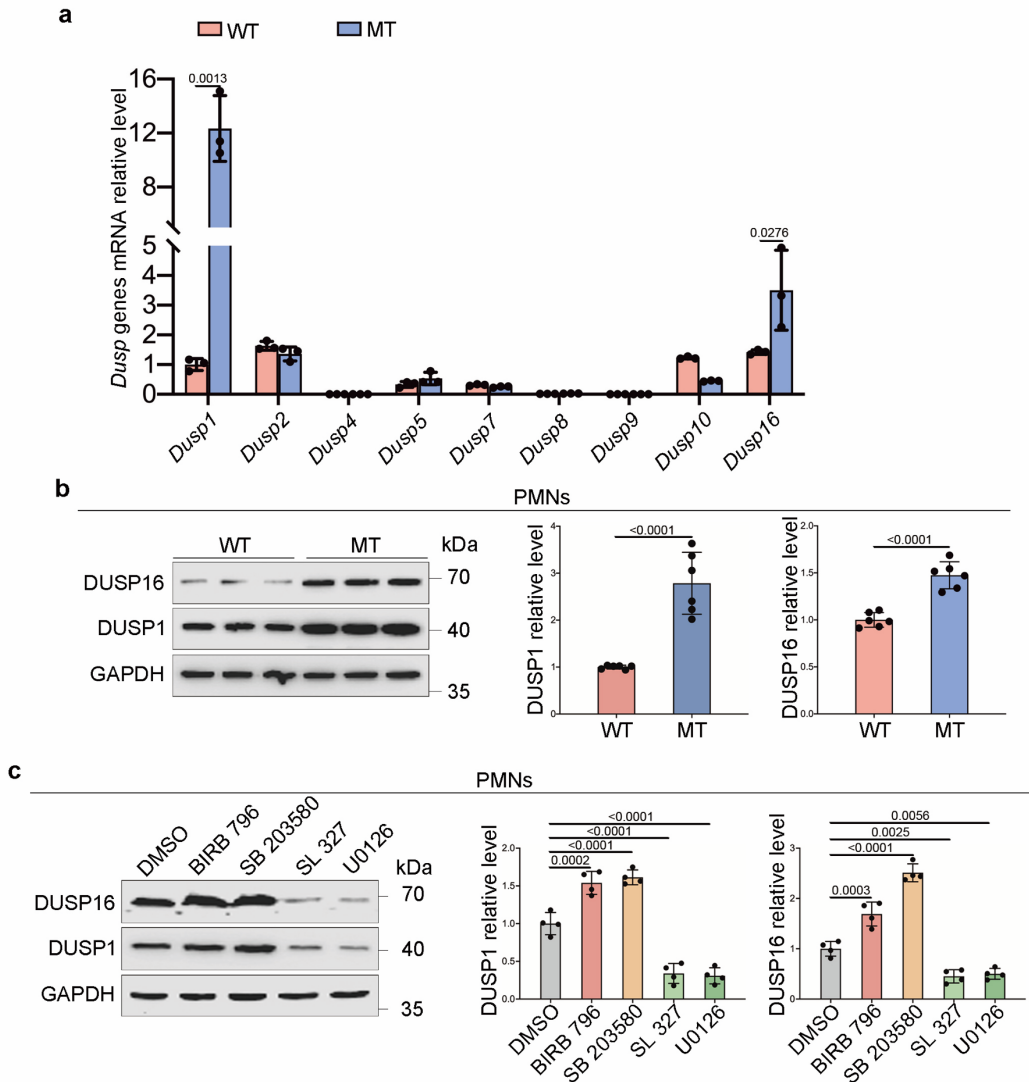

**Supplementary Figure 16. *Dusp6* deficiency induces pERK-dependent DUSP1 and DUSP16 expression in resting PMNs. (a)** Quantitative RT-PCR of *Dusp* family genes (other than *Dusp6*) in WT and *Dusp6*-deficient resting PMNs (n = 3 biological independent samples/group). **(b)** Western blots and quantitative analysis of DUSP1 and DUSP16 in WT and *Dusp6*-deficient PMNs (n = 6 biological independent samples/group). **(c)** Western blots and quantitative analysis of DUSP1 and DUSP16 in WT PMNs treated with either DMSO, p38 inhibitors (BIRB 796 or SB 203580), or MEK1/2 inhibitors (SL 327 or U0126). n = 4 biological independent samples/group. All



blots within each individual panel were performed in parallel with the same samples. All quantitative data shown in this figure are presented as mean values  $\pm$  SD. One-way ANOVA with Tukey's multiple comparison test (for **c**) and Two-sided unpaired T-test (for **a** and **b**) were used to calculate the presented p-values. Source data of **a**, **b** and **c** are provided in a Source Data File. WT: wild type; MT: *Dusp6* mutant.

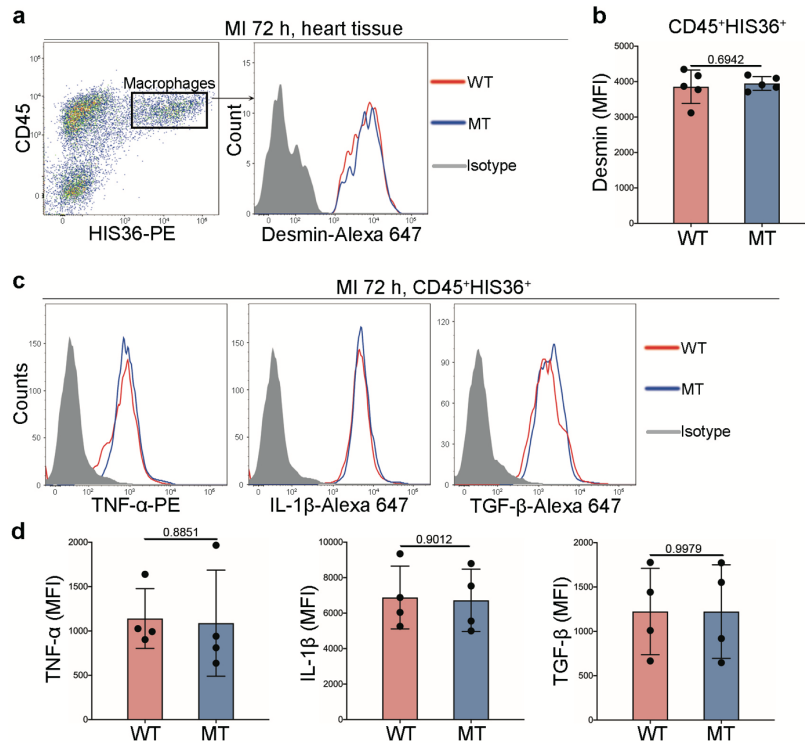

**Supplementary Figure 17. *Dusp6* deficiency has no effect on macrophage phagocytosis and cytokine production after MI. (a-b)** Intracellular staining, flow cytometry and corresponding quantitative analysis of the desmin level in CD45<sup>+</sup>HIS36<sup>+</sup> macrophages from WT and *Dusp6*-deficient LV tissue at 72 h after MI (n = 5 biological independent samples/group). **(c-d)** Cell staining and flow cytometry with TNF- $\alpha$ , IL-1 $\beta$  and TGF- $\beta$  antibody and corresponding quantitative analysis in WT and *Dusp6*-deficient CD45<sup>+</sup>HIS36<sup>+</sup> macrophages existing in infarcted LV tissues at 72 h after MI (n = 5 biological independent samples/group). All quantitative data shown in this figure are presented as mean values  $\pm$  SD. Two-sided unpaired T-test was used to calculate the presented p-values. Source data of **b** and **d** are provided in a Source Data File. WT: wild type; MT: *Dusp6* mutant.

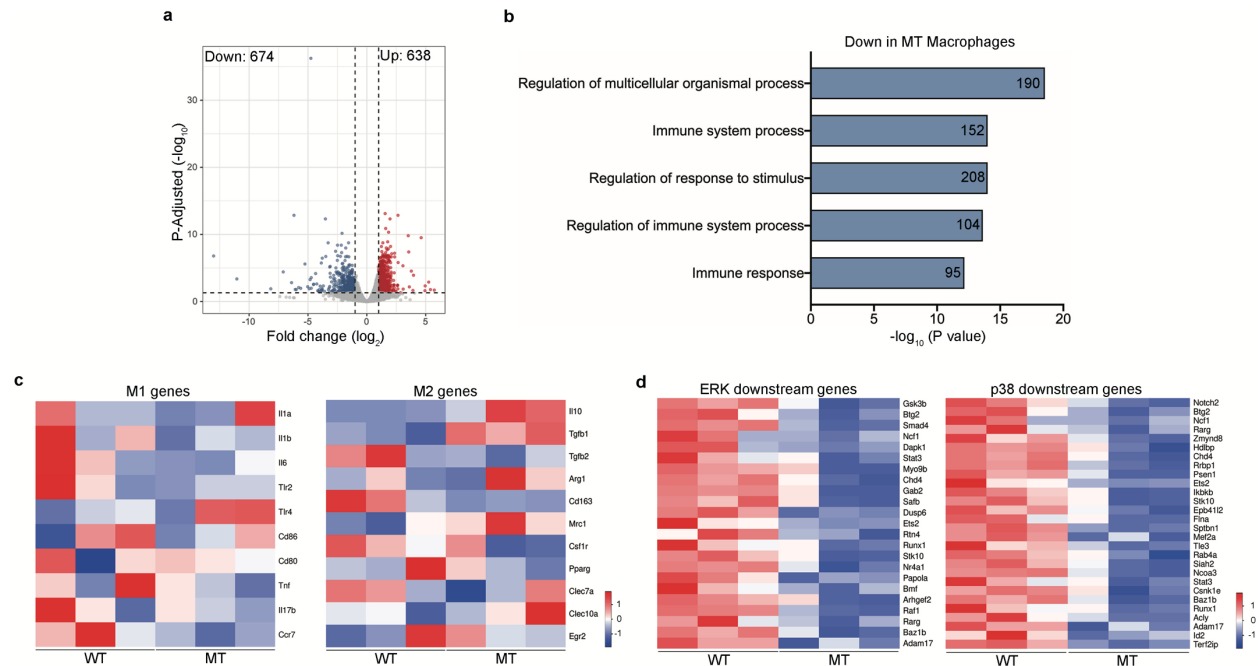

**Supplementary Figure 18. Differentially expressed genes in WT and *Dusp6*-**

**deficient macrophages at 72 h after MI. (a)** Volcano plot depicting differentially expressed genes (DEGs) showing downregulation of 674 and upregulation of 638

genes, which were defined by a fold change (log<sub>2</sub>) > 1 and adjusted P value < 0.05, in *Dusp6*-deficient compared with WT cardiac macrophages at 72 h after MI. n = 3

biological independent samples/group. The p-values were attained by the Wald test and

adjusted using the Benjamini and Hochberg's approach. **(b)** Gene ontology analysis of enriched biological processes in down-regulated genes in *Dusp6*-deficient

macrophages. Number of genes belonging to each category is indicated. **(c-d)**

Heatmaps illustrating mRNA expression fold changes of M1/M2 macrophage associated genes **(c)** and ERK/p38 downstream genes in *Dusp6*-deficient vs. WT cardiac

macrophages at 72 h after MI. WT: wild type; MT: *Dusp6* mutant.

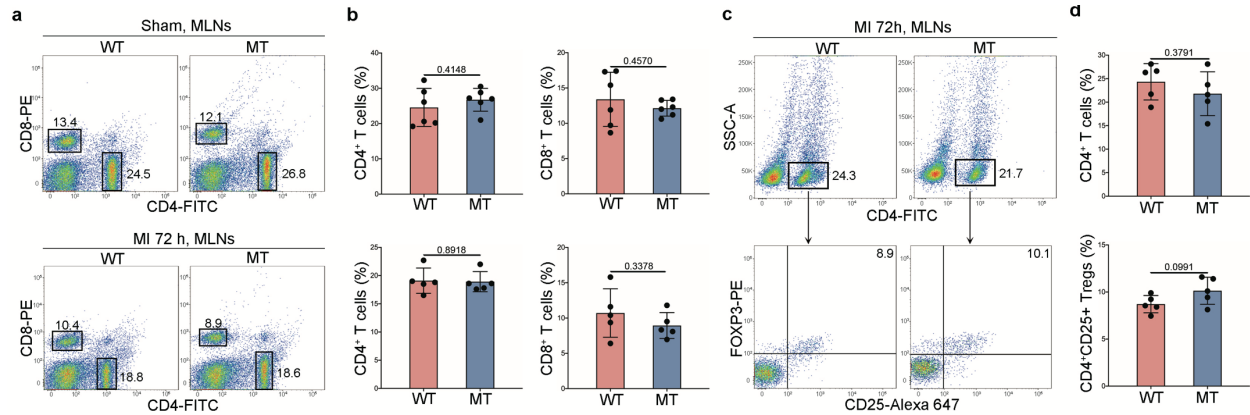

### Supplementary Figure 19. *Dusp6* deficiency has no effect on T cell development

after MI. (a-b) Cell staining and flow cytometry with CD4 and CD8 antibody and

corresponding quantitative analysis of CD4<sup>+</sup> and CD8<sup>+</sup> T cell subsets from WT and

*Dusp6*-deficient MLNs in sham-operated animals or at 72 h after MI. (c-d) Cell staining

and flow cytometry with CD4, CD25 and FOXP3 antibody and corresponding

quantitative analysis of CD4<sup>+</sup>CD25<sup>+</sup>FOXP3<sup>+</sup> Treg cells from WT and *Dusp6*-deficient

mediastinal lymph nodes at 72 h after MI. n = 5 biological independent samples/group.

All quantitative data shown in this figure are presented as mean values ± SD. Two-sided

unpaired T-test was used to calculate p-values. Source data of b and d are provided in

a Source Data File. WT: wild type; MT: *Dusp6* mutant; MLNs: mediastinal lymph nodes.

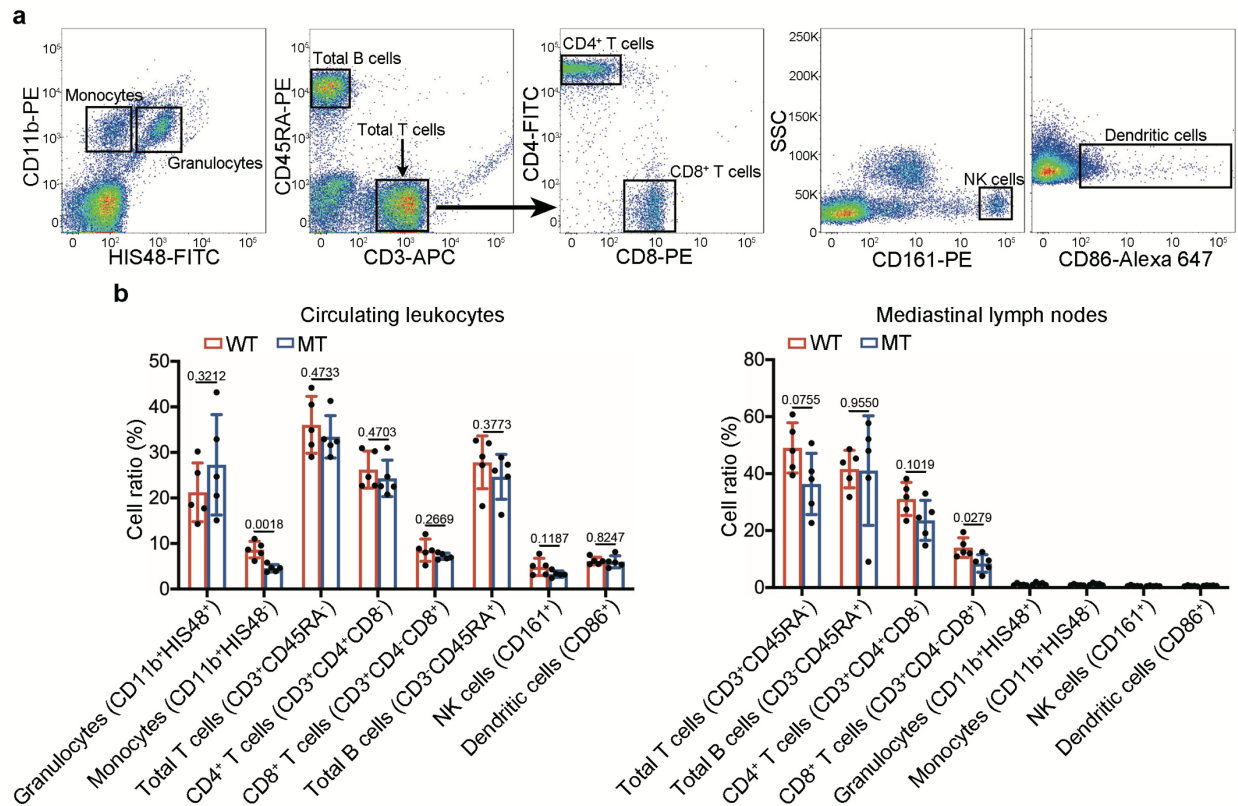

**Supplementary Figure 20. Percentage of multiple immune cell populations in peripheral leukocytes and mediastinal lymph nodes of WT and *Dusp6*-deficient rats. (a)** Representative gating images of flow cytometry analysis for immune cell populations using myeloid cell marker CD11b, granulocyte marker HIS48, T cell marker CD3/CD4/CD8, B cell marker CD45RA, NK cell marker CD161, and dendritic cell marker CD86. **(b)** Quantitative results for the flow cytometry analysis of granulocytes, monocytes, total T cells, CD4<sup>+</sup> T cells, CD8<sup>+</sup> T cells, total B cells, NK cells, and dendritic cells in WT and *Dusp6*-deficient circulating leukocytes and mediastinal lymph nodes. n = 5 biological independent samples/group. All quantitative data shown in this figure are presented as mean values ± SD. Two-sided unpaired T-test was used to calculate the

presented p-values. Source data of **b** are provided in a Source Data File. WT: wild type;  
MT: *Dusp6* mutant.

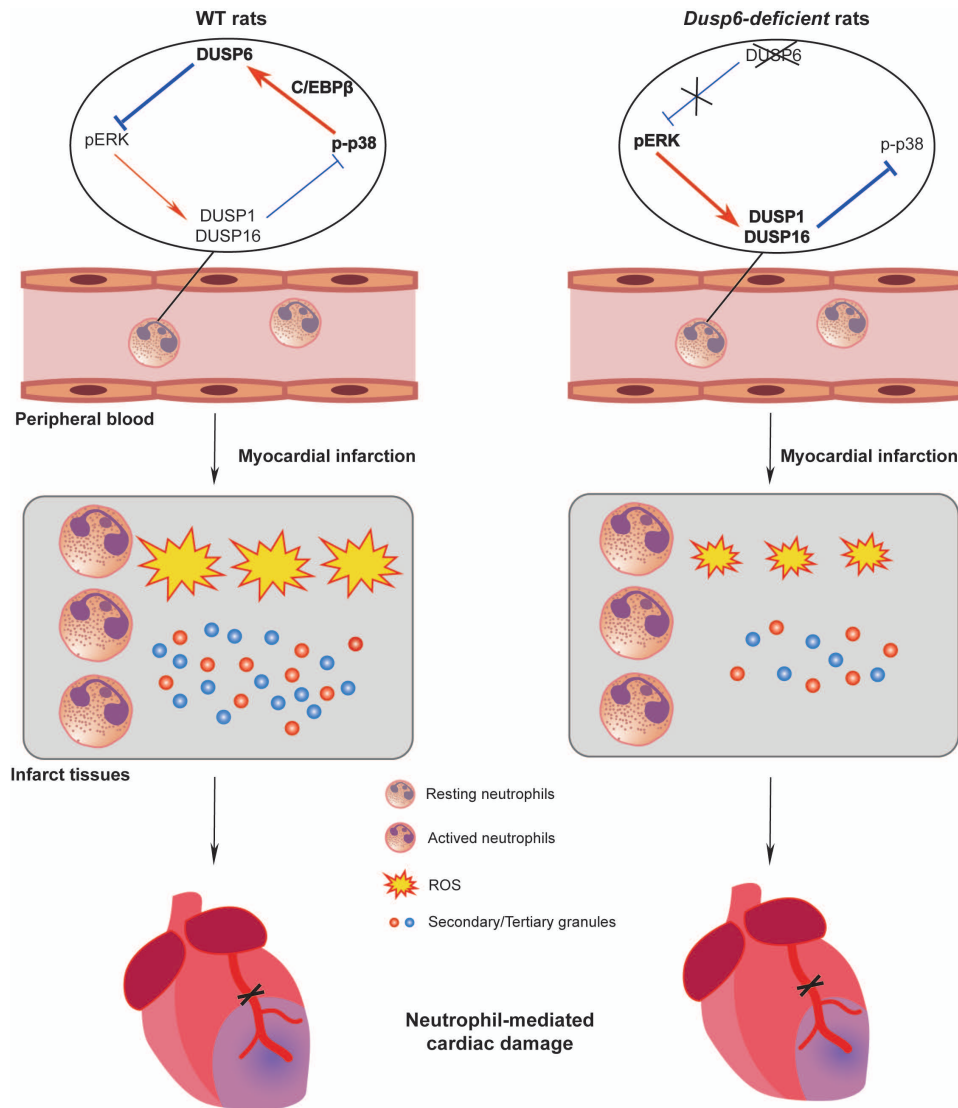

**Supplementary Figure 21. Working model of the role of DUSP6 in neutrophil-mediated cardiac damage.** DUSP6 is a critical effector for maintaining a high level of p-p38 MAPK by dephosphorylating pERK in resting neutrophils, where *Dusp6* itself is transcriptionally regulated by p-p38-C/EBPβ and the two p38 phosphatases DUSP1 and DUSP16 are regulated by pERK. *Dusp6* deficiency leads to elevated pERK and thus induces the expression of DUSP1 and DUSP16 to inhibit p-p38 activity, resulting in less ROS and secondary/tertiary granule release from neutrophils while having no effect on their maturation and chemotaxis-induced infiltration. Therefore, *Dusp6* deficiency

improves cardiac repair and function by attenuating neutrophil inflammation and cardiac damage at the inflammatory stage post-MI.



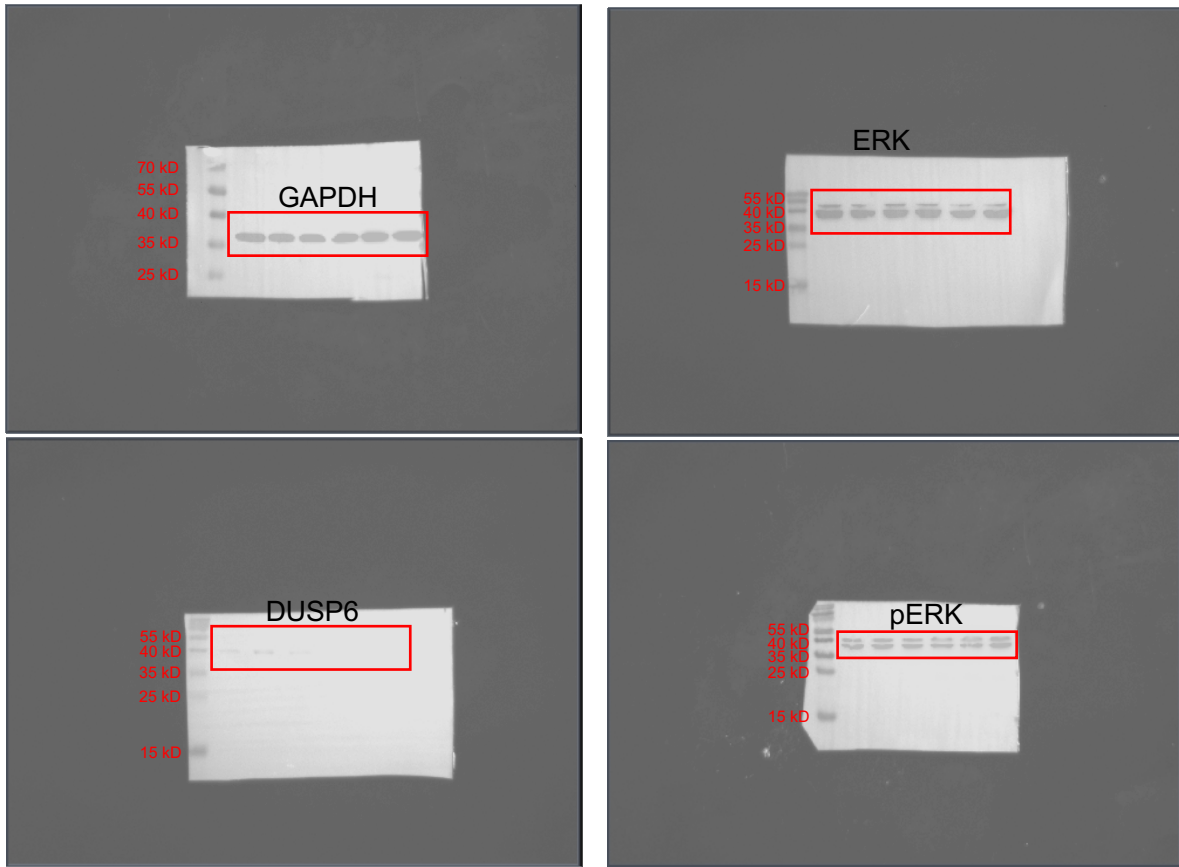

**Supplementary Figure 22. Uncropped blots shown in Supplementary Figure 1b.**

Indicated boxes show the corresponding cropped blots.

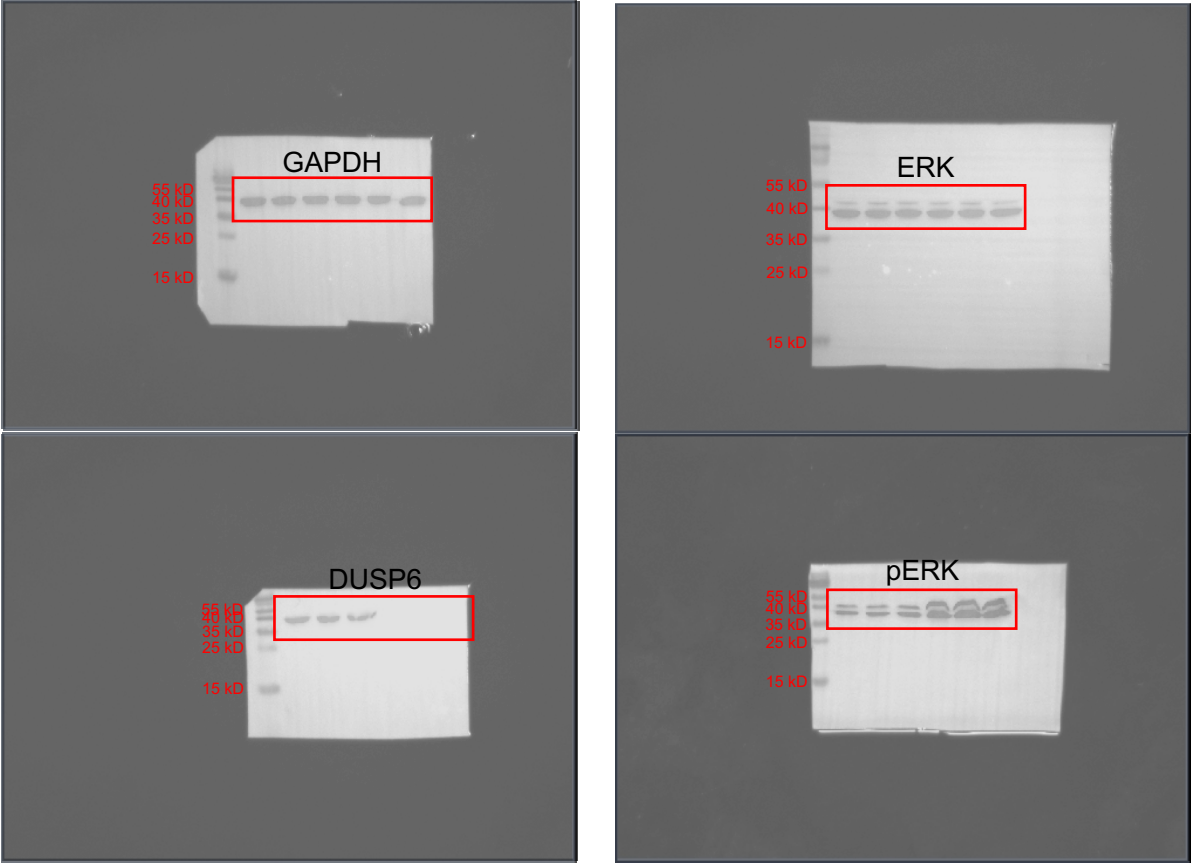

**Supplementary Figure 23. Uncropped blots shown in Supplementary Figure 1d.**

Indicated boxes show the corresponding cropped blots.

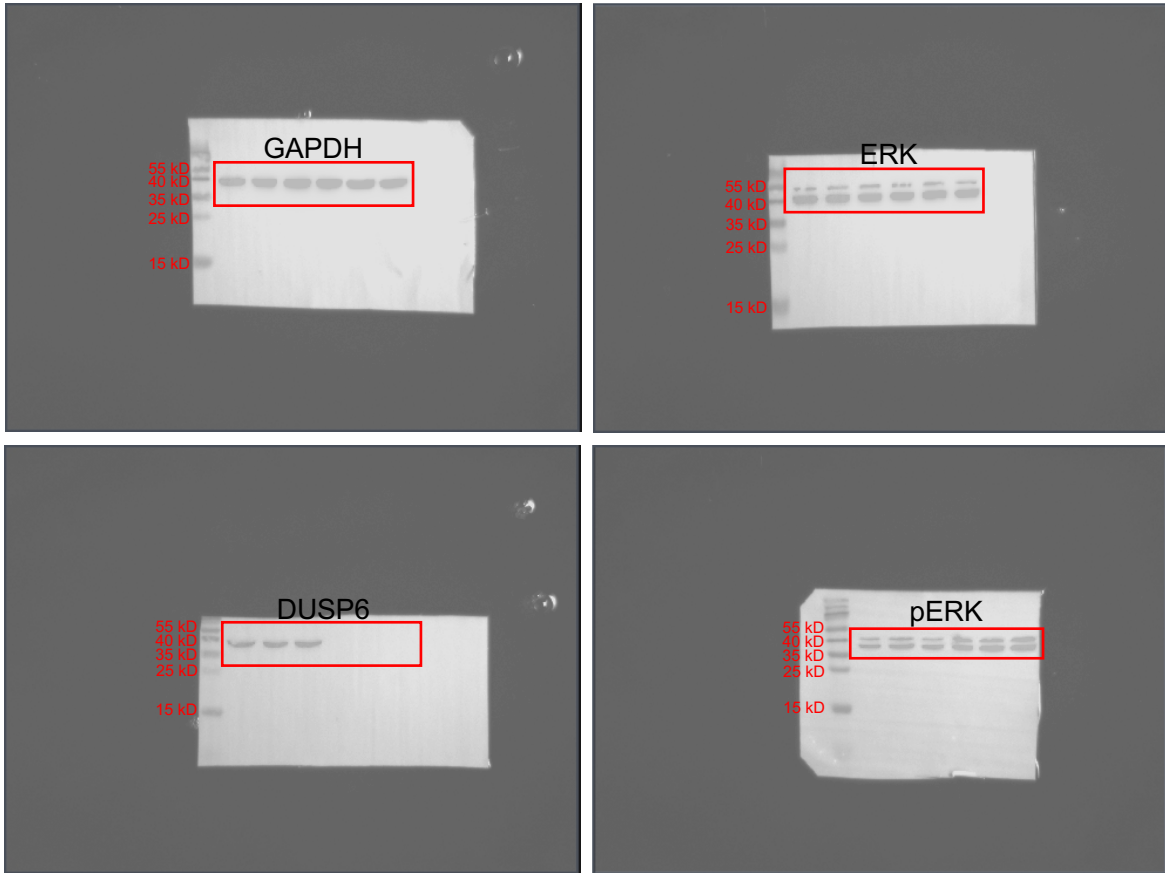

**Supplementary Figure 24. Uncropped blots shown in Supplementary Figure 1f.**

Indicated boxes show the corresponding cropped blots.

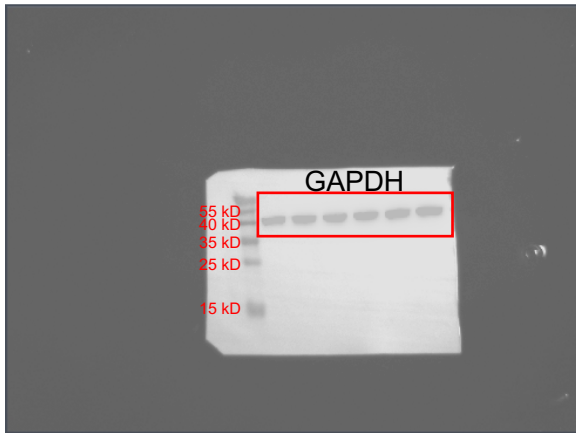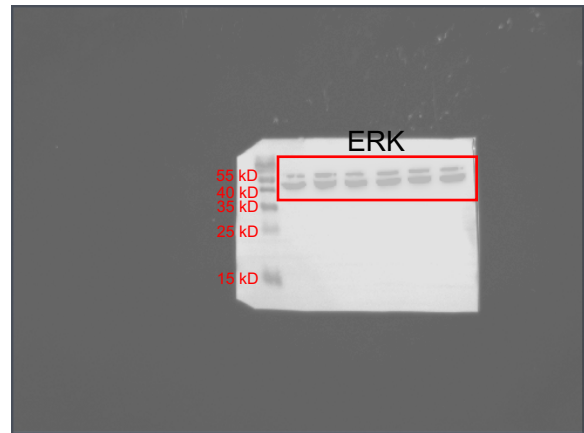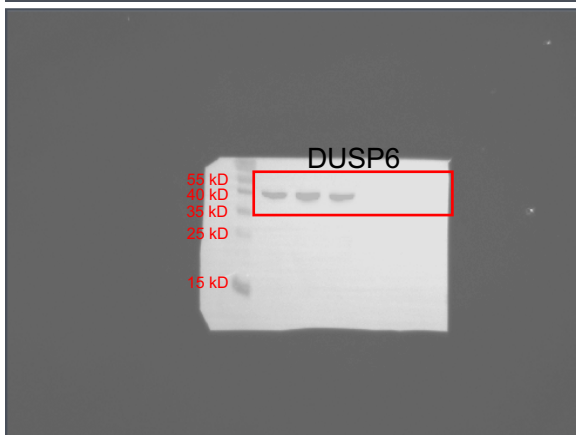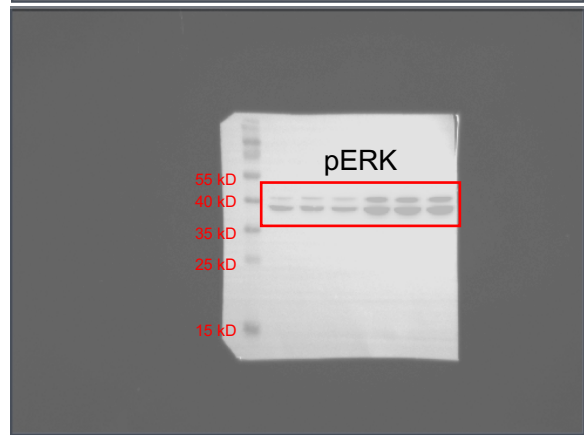

**Supplementary Figure 25. Uncropped blots shown in Supplementary Figure 1h.**

Indicated boxes show the corresponding cropped blots.

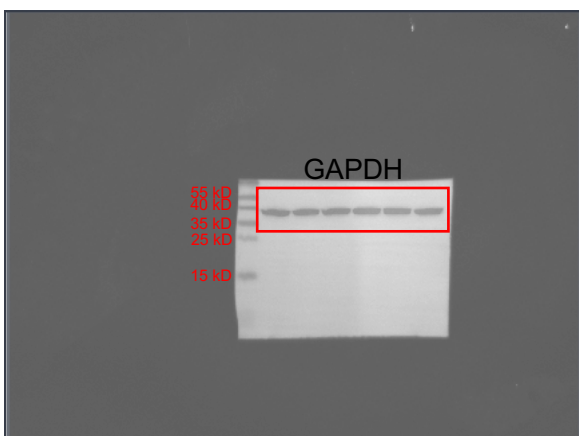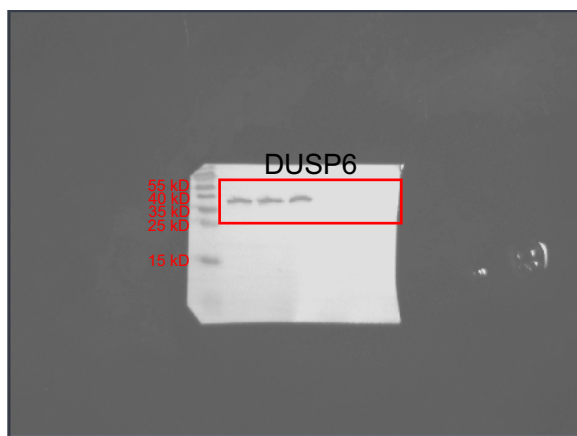

**Supplementary Figure 26. Uncropped blots shown in Supplementary Figure 11b. Indicated boxes show the corresponding cropped blots.**

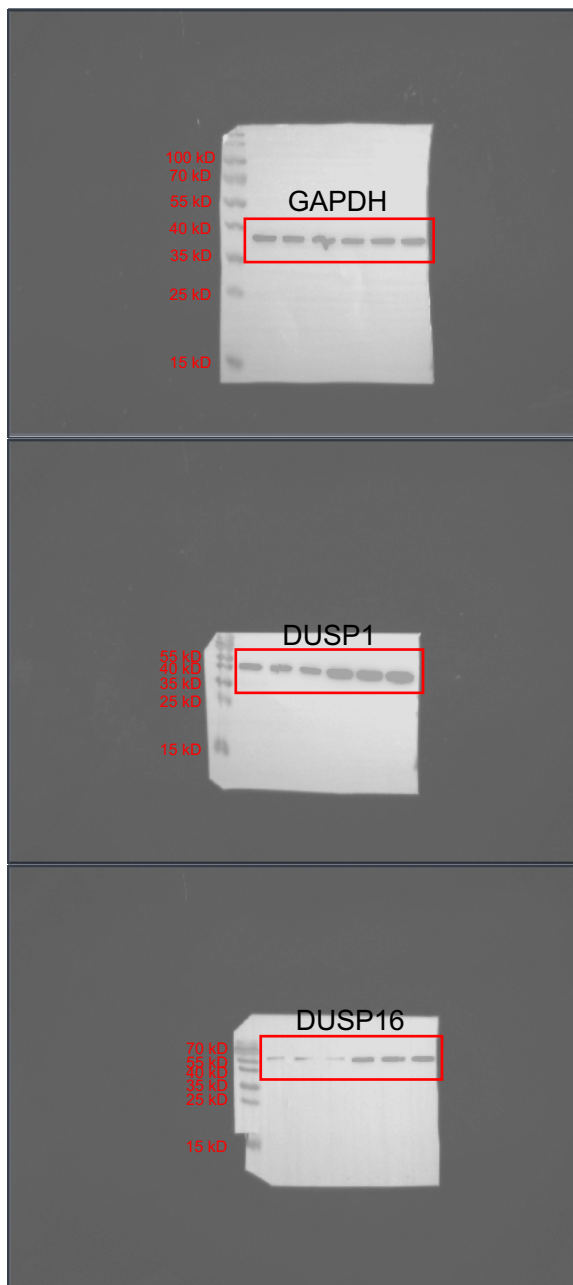

**Supplementary Figure 27. Uncropped blots shown in Supplementary Figure 16b. Indicated boxes show the corresponding cropped blots.**

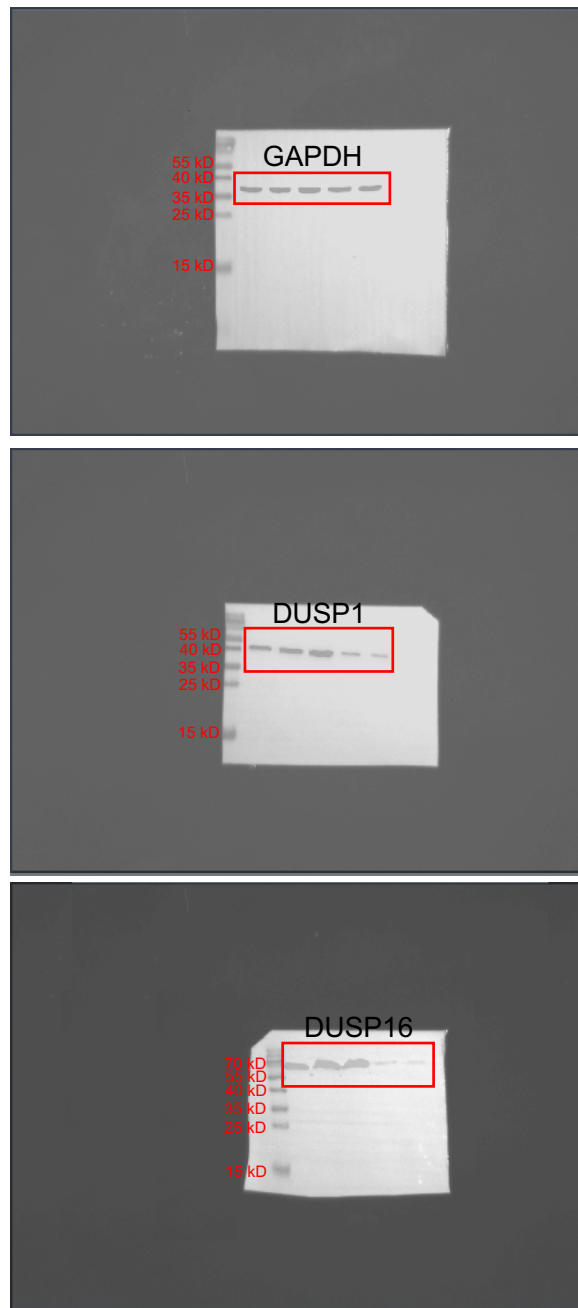

**Supplementary Figure 28. Uncropped blots shown in Supplementary Figure 16c.**

Indicated boxes show the corresponding cropped blots.

## Supplementary Tables

Supplementary Table I. Primer sequences for qRT-PCR and ChIP-PCR

| Primer name                     | Sequence                 |
|---------------------------------|--------------------------|
| <i>Dusp1</i> (rat) forward      | CTGCTTCTGGATTGTCGCTCC    |
| <i>Dusp1</i> (rat) reverse      | GCTGCGTTCGTCCAGCAGCA     |
| <i>Dusp2</i> (rat) forward      | GTGCACTGCCAAGCTGGTAT     |
| <i>Dusp2</i> (rat) reverse      | GTGACACAGCACCTGGGTCT     |
| <i>Dusp4</i> (rat) forward      | TGCCAGGCCGGCATCTCTAG     |
| <i>Dusp4</i> (rat) reverse      | GCAGGACGTGGTGAGCACCT     |
| <i>Dusp5</i> (rat) forward      | CATGCATCCAAGTGCGAGTT     |
| <i>Dusp5</i> (rat) reverse      | GACACAGTCAATAAAATCTA     |
| <i>Dusp6</i> (rat) forward      | GGAAATGGCGATCAGCAAGA     |
| <i>Dusp6</i> (rat) reverse      | TCCTCGCAGCGCGTGAATAG     |
| <i>Dusp6</i> (rat) ChIP forward | CTAGCCAGCGAAATATG        |
| <i>Dusp6</i> (rat) ChIP reverse | CGACTTGGAGGTCCAAG        |
| <i>Dusp7</i> (rat) forward      | CGCTCCAAGAAGTGCGGTGT     |
| <i>Dusp7</i> (rat) reverse      | CTGGGTGTGTGGTTGTCGCA     |
| <i>Dusp8</i> (rat) forward      | TGCTGAGCTCTGTGAACATCTGCT |
| <i>Dusp8</i> (rat) reverse      | ACTGTCTGAAGCAGCCGTCCA    |
| <i>Dusp9</i> (rat) forward      | ACTTGGTCAAGCGGAAGAAG     |
| <i>Dusp9</i> (rat) reverse      | AAGGTGGGTCTGAGACAGTG     |
| <i>Dusp10</i> (rat) forward     | CAAGCAGCTAGCCAGCATCAAA   |



|                             |                          |
|-----------------------------|--------------------------|
| <i>Dusp10</i> (rat) reverse | ATCTTGCCCTGTTGCAGCCT     |
| <i>Dusp16</i> (rat) forward | CTCAACAAGGAGCTGATGCAACAG |
| <i>Dusp16</i> (rat) reverse | GATCCCAGCCAAGCAGTGGA     |

**Supplementary Table 2. Measurement of organ weights.**

|                         | WT<br>(2-month old) | <i>Dusp6</i> mutant<br>(2-month old) |
|-------------------------|---------------------|--------------------------------------|
| Body weight (BW) (g)    | 287 ± 13.4          | 279 ± 17.9                           |
| Liver weight/BW (mg/g)  | 37 ± 3.2            | 41 ± 1.8 (p=0.0753)                  |
| Spleen weight/BW (mg/g) | 2.4 ± 0.1           | 4.2 ± 0.5 (p<0.0001)                 |
| Lung weight/BW (mg/g)   | 4.2 ± 0.3           | 4.4 ± 0.2 (p=0.4963)                 |
| Heart weight/BW (mg/g)  | 2.8 ± 0.1           | 3.2 ± 0.2 (p=0.0020)                 |
| Kidney weight/BW (mg/g) | 7.8 ± 0.5           | 7.2 ± 0.4 (p=0.0601)                 |

Values are mean ± SD; n = 6 rats/group; Two-sided unpaired T-test.

**Supplementary Table 3. Heart physiological data.**

|             |                     | <b>EF</b><br>(%) | <b>FS</b><br>(%) | <b>LVEDV</b><br>(mm <sup>3</sup> ) | <b>LVESV</b><br>(mm <sup>3</sup> ) |
|-------------|---------------------|------------------|------------------|------------------------------------|------------------------------------|
| Pre-surgery | WT                  | 69.79±5.44       | 39.80±3.50       | 216.3±45.3                         | 69.35±18.35                        |
|             | <i>Dusp6</i> mutant | 71.61±7.08       | 40.57±6.66       | 193.0±35.6                         | 57.55±15.39                        |
|             | P-value             | 0.9810           | 0.9888           | 0.7855                             | 0.9214                             |
| MI 4 w      | WT                  | 33.07±11.38      | 16.91±6.72       | 390.2±70.0                         | 242.4±81.0                         |
|             | <i>Dusp6</i> mutant | 54.26±8.33       | 29.73±6.15       | 320.5±83.5                         | 139.2±45.5                         |
|             | P-value             | <0.0001          | <0.0001          | 0.0366                             | <0.0001                            |

Values are mean ± SD. WT, n = 11; *Dusp6* mutant, n = 13. One-way ANOVA with Tukey's multiple comparison test. EF, ejection fraction; FS, fractional shortening; LVEDV, left ventricular end-diastolic volume; LVESV, left ventricular end-systolic volume.
